# Supplementary material
Source: PubMed Central journal article supplement (PMC5141274)

A

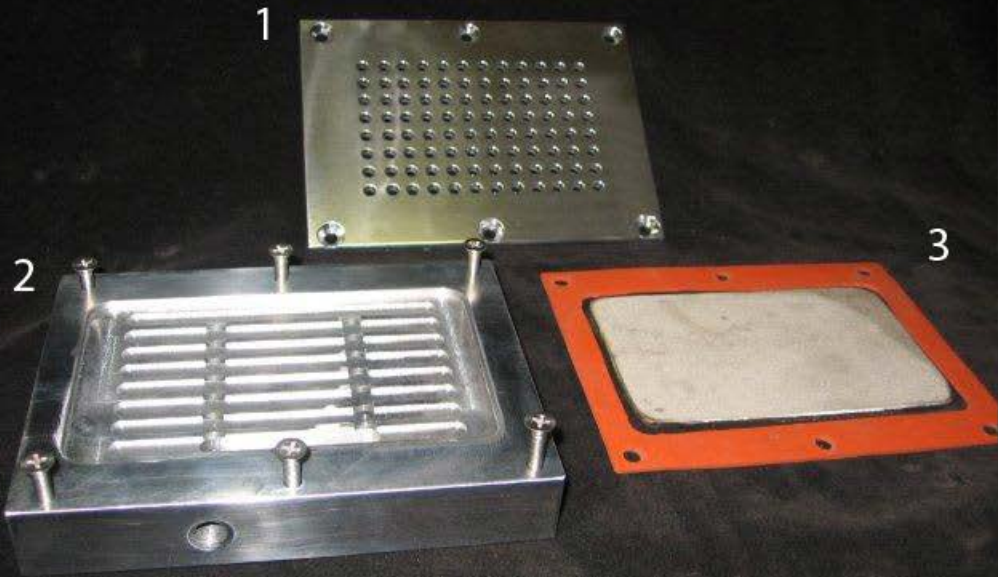

B

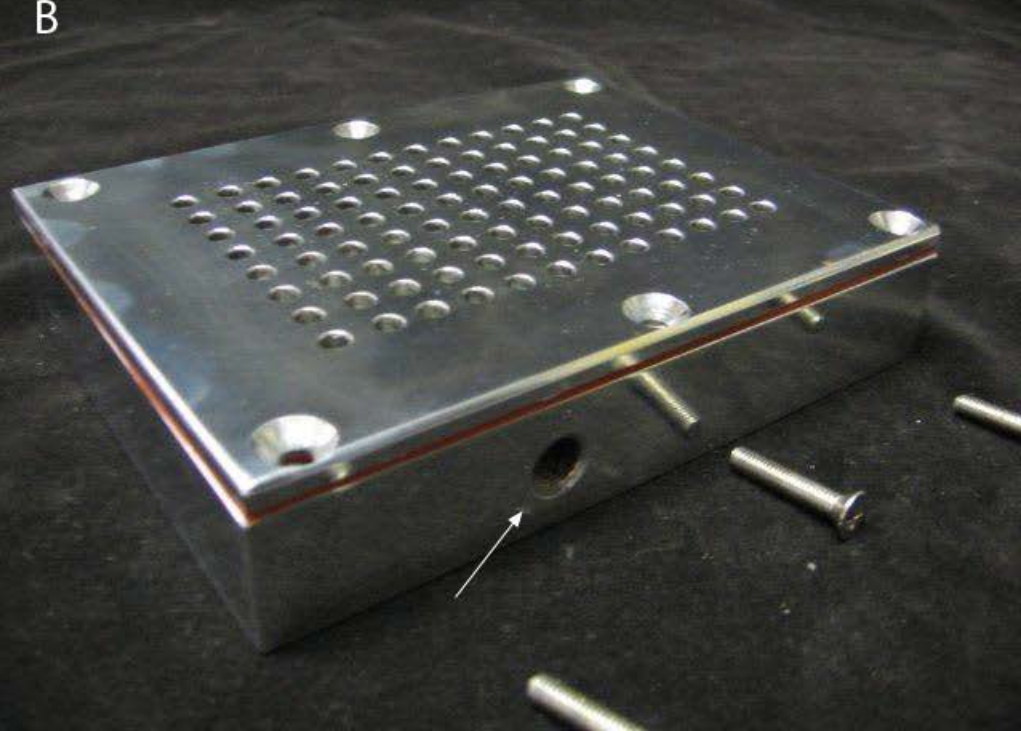

Supplement: supp_M116.058081_FigureS1.pdf [file supp_M116.058081_FigureS1.pdf]

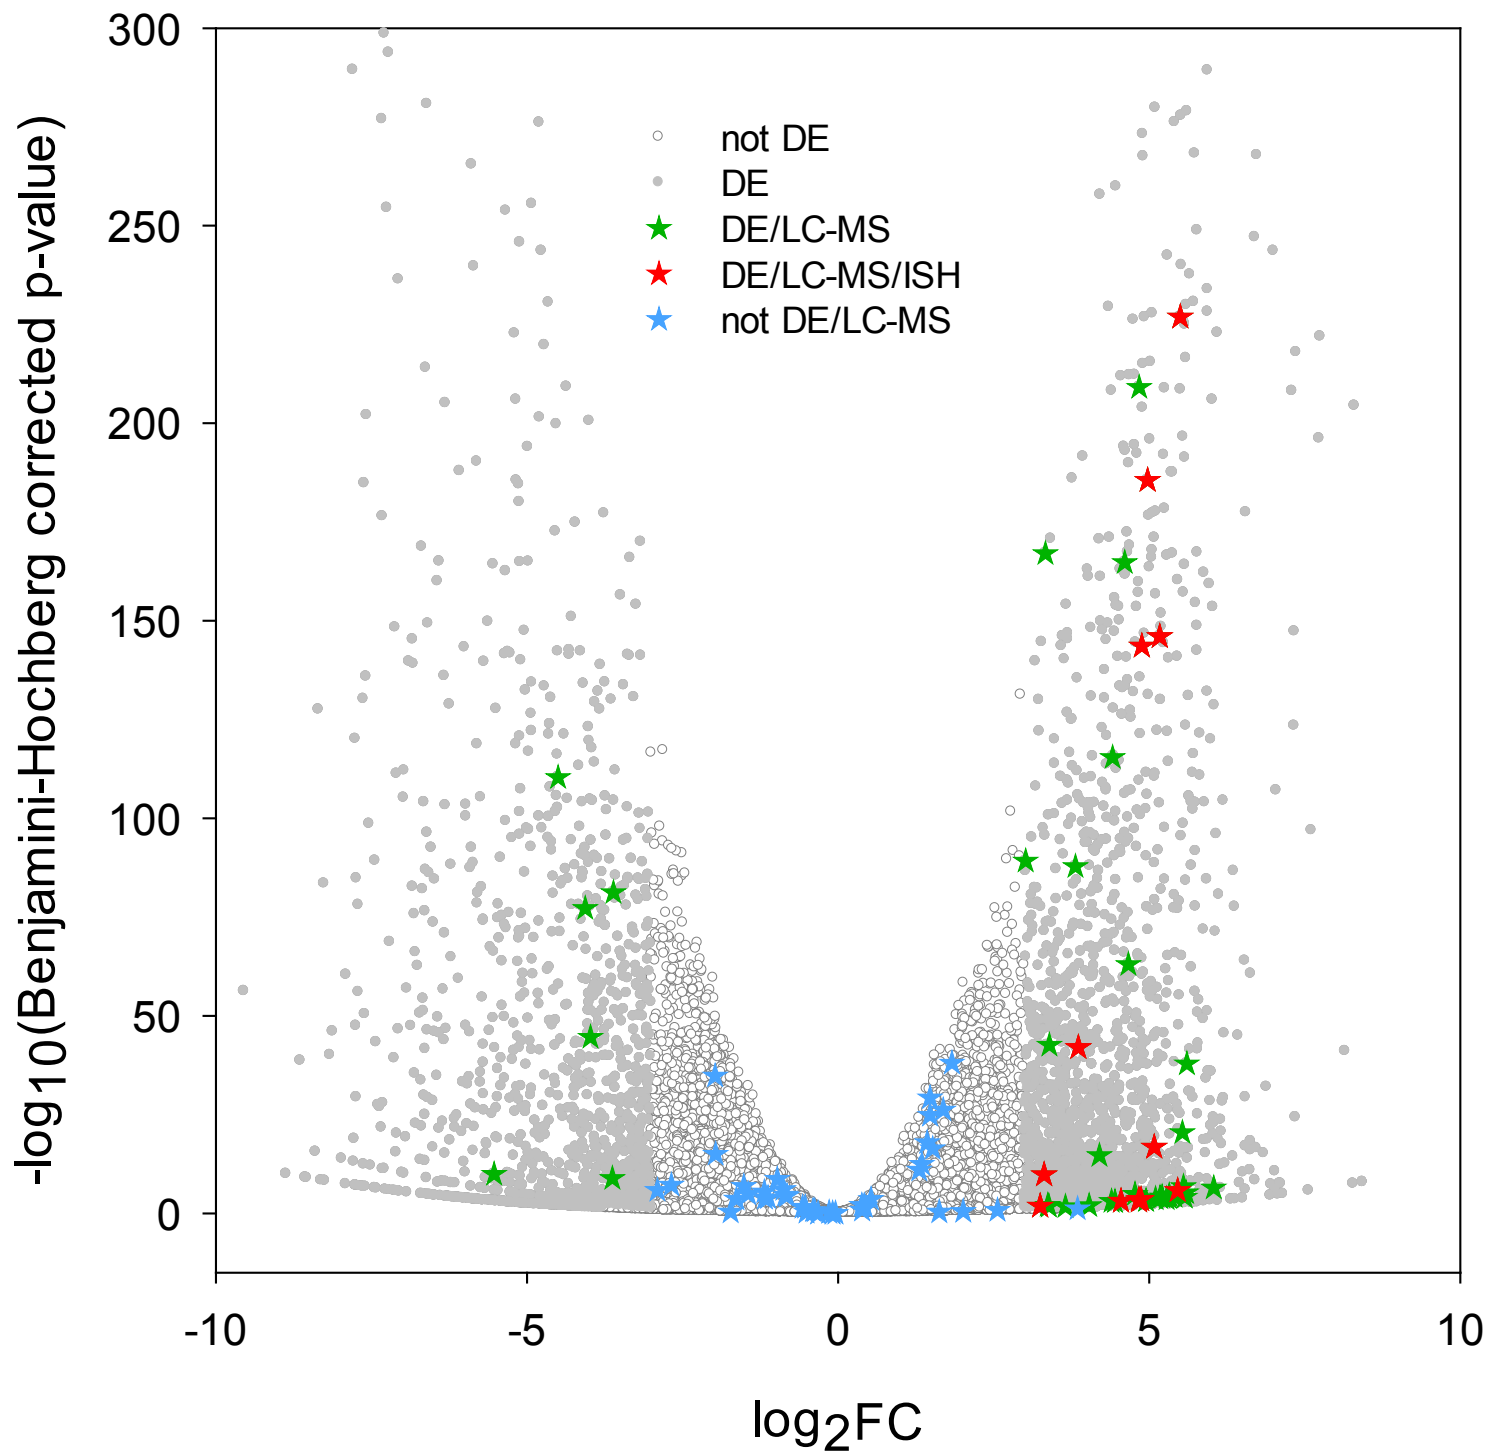

Supplement: supp_M116.058081_FigureS2.pdf [file supp_M116.058081_FigureS2.pdf]
